# Supplementary material for: Airway Microbiota and Pathogen Abundance in Age-Stratified Cystic Fibrosis Patients
Source: PLoS One. 2010 Jun 23;5(6):e11044. doi: 10.1371/journal.pone.0011044 (PMC2890402; doi:10.1371/journal.pone.0011044)
Supplement: Table S3 — Correlation of taxon abundance with patient age. (0.05 MB XLS) [file pone.0011044.s003.xls]

## Sheet: Sheet1
Phylum	Class	Order	Family	Subfamily ID	Taxon ID	Representative ProkMSA	Representative NCBI Accession	Representative Name	Correlation Coefficient	P value	Benjamini Hochberg adjusted P value
Proteobacteria	Alphaproteobacteria	Sphingomonadales	Sphingomonadaceae	sf_1	7215	50190	AF445712.1	Hot spring clone	0.456715	0.000355554	1.93341e-07
Proteobacteria	Gammaproteobacteria	Pseudomonadales	Pseudomonadaceae	sf_1	9050	53970	AF139998.1	Pseudomonas sp.	0.44891	0.000460896	5.01246e-07
Proteobacteria	Gammaproteobacteria	Pseudomonadales	Pseudomonadaceae	sf_1	9049	32552	AJ296559.1	Soil clone	0.447258	0.000486523	7.93675e-07
Proteobacteria	Gammaproteobacteria	Pseudomonadales	Pseudomonadaceae	sf_1	8725	47897	AJ419674.1	Pseudomonas sp.	0.443663	0.000546846	1.18944e-06
Proteobacteria	Betaproteobacteria	MND1 clone group	Unclassified	sf_1	7818	76574	AJ534623.1	Soil clone	0.429795	0.000848229	2.30622e-06
Proteobacteria	Gammaproteobacteria	Pseudomonadales	Pseudomonadaceae	sf_1	9056	47079	AB037546.1	Pseudomonas aeruginosa str. #47	0.419917	0.00114676	4.98861e-06
Proteobacteria	Gammaproteobacteria	Pseudomonadales	Pseudomonadaceae	sf_1	9219	29593	AF181576.1	Pseudomonas sp.	0.407443	0.00165697	8.10914e-06
Firmicutes	Bacilli	Bacillales	Bacillaceae	sf_1	3375	30044	AF423230.1	Soil clone	0.40405	0.00182701	9.93478e-06
Bacteroidetes	Sphingobacteria	Sphingobacteriales	Crenotrichaceae	sf_11	5654	63062	AB088636.1	Saprospira grandis	-0.396046	0.00229151	1.37067e-05
Proteobacteria	Deltaproteobacteria	Desulfobacterales	Desulfobulbaceae	sf_1	10332	10816	AF099059.1	Unnamed sulfate-reducer†	0.391633	0.0025902	1.69018e-05
Bacteroidetes	Bacteroidetes	Bacteroidales	Bacteroidaceae	sf_12	5837	71331	AF132263.1	Human fecal matter clone†	-0.378473	0.00369683	2.61331e-05
Cyanobacteria	Cyanobacteria	Chloroplasts	Chloroplasts	sf_11	5098	20563	AF289245.1	Algal associated clone	-0.376182	0.00392726	3.20331e-05
OP8	Unclassified	Unclassified	Unclassified	sf_3	598	33161	AF419671.1	Hydrothermal sediment clone	-0.373967	0.00416212	3.62121e-05
Actinobacteria	Actinobacteria	Actinomycetales	Actinomycetaceae	sf_1	1368	17127	AJ243893.1	Actinomyces urogenitalis†	-0.373137	0.00425318	3.9317e-05
Firmicutes	Bacilli	Lactobacillales	Aerococcaceae	sf_1	3736	15266	Y14650.1	Desemzia incerta	-0.371916	0.00439038	4.29727e-05
Proteobacteria	Gammaproteobacteria	Pseudomonadales	Pseudomonadaceae	sf_1	8691	59263	AE004501.1	Pseudomonas aeruginosa str. PAO1	0.37009	0.00460297	4.75565e-05
Bacteroidetes	KSA1	Unclassified	Unclassified	sf_1	5951	79775	AF449785.1	CFB group clone	-0.366795	0.00500941	5.44797e-05
Proteobacteria	Gammaproteobacteria	Pseudomonadales	Pseudomonadaceae	sf_1	9175	52734	AF405328.1	Pseudomonas extremorientalis	0.359991	0.00594984	6.79427e-05
Proteobacteria	Alphaproteobacteria	Rickettsiales	Rickettsiaceae	sf_1	7556	5950	U11014.1	Rickettsia bellii*	-0.359416	0.00603594	7.22081e-05
Proteobacteria	Gammaproteobacteria	Thiotrichales	Piscirickettsiaceae	sf_3	9392	71369	AJ244761.1	Methylophaga sp.	0.357262	0.00636836	7.96477e-05
Proteobacteria	Gammaproteobacteria	Enterobacteriales	Enterobacteriaceae	sf_1	8607	63939	AF476100.1	Amonostherium lichtensioides symbiont	-0.353889	0.00692117	9.40888e-05
Proteobacteria	Gammaproteobacteria	Pseudomonadales	Pseudomonadaceae	sf_1	8508	70116	AF530073.1	Pseudomonas citronellolis	0.351509	0.00733609	0.000103718
Proteobacteria	Alphaproteobacteria	Rhodobacterales	Rhodobacteraceae	sf_1	7084	45671	AF359546.1	Scrippsiella trochoidea	-0.349949	0.00761962	0.00011187
Verrucomicrobia	Verrucomicrobiae	Verrucomicrobiales	Xiphinematobacteraceae	sf_3	888	29275	AF217462.1	Candidatus Xiphinematobacter brevicolli	-0.349186	0.00776177	0.000118178
Actinobacteria	Actinobacteria	Acidimicrobiales	Acidimicrobiaceae	sf_1	1360	63301	AF523917.1	Forested wetland clone	-0.348157	0.00795718	0.00012548
Chlamydiae	Chlamydiae	Chlamydiales	Chlamydiaceae	sf_1	4820	112346	NC_002179.2	Chlamydophila pneumoniae str. AR39*	-0.347093	0.00816364	0.000137614
Proteobacteria	Betaproteobacteria	MND1 clone group	Unclassified	sf_1	7993	27267	AF423222.1	Soil clone	0.344729	0.00863898	0.000150325
Firmicutes	Mollicutes	Acholeplasmatales	Acholeplasmataceae	sf_1	3955	64303	AF521672.1	Unnamed phytoplasma*	-0.34448	0.00869058	0.000155948
Firmicutes	Clostridia	Clostridiales	Clostridiaceae	sf_12	4551	16187	X78070.1	Clostridium acetobutylicum†	0.341767	0.00926864	0.000171361
Proteobacteria	Gammaproteobacteria	Pseudomonadales	Pseudomonadaceae	sf_1	8754	20529	AB076857.1	Pseudomonas sp.	0.339502	0.00977668	0.000186071
Proteobacteria	Gammaproteobacteria	Pseudomonadales	Pseudomonadaceae	sf_1	9002	46183	AJ316016.1	Paederus fuscipes endosymbiont	0.336366	0.0105196	0.000205931
Bacteroidetes	Bacteroidetes	Bacteroidales	Prevotellaceae	sf_1	6152	2069	AF001768.1	Rumen clone†	-0.331244	0.0118383	0.000238183
Proteobacteria	Deltaproteobacteria	Unclassified	Unclassified	sf_9	9784	78912	AY177804.1	Sediment clone	-0.328041	0.0127332	0.000263111
Proteobacteria	Gammaproteobacteria	Pseudomonadales	Pseudomonadaceae	sf_1	9588	61102	AF530072.1	Pseudomonas citronellolis	0.327357	0.0129319	0.000274248
Proteobacteria	Gammaproteobacteria	Aeromonadales	Succinivibrionaceae	sf_1	8822	60771	AF497809.1	Anaerobiospirillum sp.†	-0.327181	0.0129834	0.000282401
Firmicutes	Clostridia	Clostridiales	Lachnospiraceae	sf_5	4501	17517	AF385563.1	Crevicular epithelium clone†	0.323913	0.0139724	0.000319108
Bacteroidetes	Bacteroidetes	Bacteroidales	Rikenellaceae	sf_5	5947	57462	AJ441218.1	Polychaete mucous clone†	-0.322897	0.0142927	0.000341969
Bacteroidetes	Flavobacteria	Flavobacteriales	Flavobacteriaceae	sf_1	5401	58282	AF543295.1	Capnocytophaga gingivalis†	-0.322491	0.0144224	0.000360755
Proteobacteria	Gammaproteobacteria	Alteromonadales	Alteromonadaceae	sf_1	8594	66955	AF482686.1	Marinobacter sp.	0.32129	0.0148123	0.000378564
Bacteroidetes	Flavobacteria	Flavobacteriales	Flavobacteriaceae	sf_1	5836	2377	U41348.1	Capnocytophaga granulosa†	-0.320644	0.0150256	0.000392185
Actinobacteria	Actinobacteria	Actinomycetales	Mycobacteriaceae	sf_1	1308	75651	AJ431371.1	Mycobacterium pyrenivorans	-0.320039	0.0152277	0.000405741
Bacteroidetes	Bacteroidetes	Bacteroidales	Porphyromonadaceae	sf_1	5652	78288	AB088943.1	Termite gut clone†	-0.31975	0.0153253	0.000416674
Proteobacteria	Betaproteobacteria	Burkholderiales	Comamonadaceae	sf_1	7884	40205	AJ421915.2	Elbe river clone	0.318662	0.0156966	0.000435306
Proteobacteria	Gammaproteobacteria	Pasteurellales	Pasteurellaceae	sf_1	9587	70062	AF268958.1	Actinobacillus porcinus	-0.318278	0.0158296	0.000447602
Proteobacteria	Gammaproteobacteria	Pseudomonadales	Pseudomonadaceae	sf_1	9005	66199	AJ278108.1	Pseudomonas sp.	0.317474	0.016111	0.000464319
Proteobacteria	Gammaproteobacteria	Pseudomonadales	Pseudomonadaceae	sf_1	8553	107075	AB046997.1	Pseudomonas fulva	0.315815	0.0167054	0.000490533
Proteobacteria	Betaproteobacteria	Burkholderiales	Burkholderiaceae	sf_1	7918	7280	U16140.1	Burkholderia sp.	0.314188	0.0173063	0.00051759
Proteobacteria	Alphaproteobacteria	Rhodobacterales	Rhodobacteraceae	sf_1	6888	55371	AF254109.1	Hydrothermal vent strain	0.313101	0.0177183	0.000549181
Proteobacteria	Gammaproteobacteria	Pasteurellales	Pasteurellaceae	sf_1	9213	46278	AF224307.1	Haemophilus quentini	-0.311505	0.0183377	0.000578352
Firmicutes	Mollicutes	Anaeroplasmatales	Erysipelotrichaceae	sf_3	3943	74862	AB030218.1	Coprobacillus cateniformis*	-0.309681	0.0190686	0.000611771
Bacteroidetes	Flavobacteria	Flavobacteriales	Flavobacteriaceae	sf_1	5914	108689	AY771714.1	Psychroserpens burtonensis†	-0.309388	0.0191881	0.000626039
Firmicutes	Clostridia	Clostridiales	Clostridiaceae	sf_12	4574	47394	NC_003030.1	Clostridium acetobutylicum†	0.309264	0.0192387	0.000638153
Proteobacteria	Gammaproteobacteria	Xanthomonadales	Xanthomonadaceae	sf_3	8577	68800	AF442743.1	Xanthomonas axonopodis	0.30832	0.0196297	0.000661797
Firmicutes	Bacilli	Bacillales	Bacillaceae	sf_1	246	85211	AJ509006.1	Bacillus sp.	0.306317	0.0204808	0.000712765
Bacteroidetes	Bacteroidetes	Bacteroidales	Porphyromonadaceae	sf_1	5295	72093	AF371910.1	Swine intestine clone†	-0.305881	0.0206702	0.000730594
Proteobacteria	Alphaproteobacteria	Sphingomonadales	Sphingomonadaceae	sf_1	6663	105812	AY554010.1	Sphingopyxis flavimaris	0.305082	0.0210214	0.000754438
Proteobacteria	Gammaproteobacteria	Xanthomonadales	Xanthomonadaceae	sf_3	9320	74443	AJ318204.1	Waste-gas biofilter clone	0.304209	0.0214105	0.000780045
Firmicutes	Bacilli	Bacillales	Thermoactinomycetaceae	sf_1	3301	78614	AB088361.1	Thermoactinomyces sp.	0.303061	0.0219315	0.000810954
Bacteroidetes	Bacteroidetes	Bacteroidales	Unclassified	sf_15	5578	76499	AJ534685.1	Ground water clone†	-0.302804	0.0220498	0.000827316
Proteobacteria	Gammaproteobacteria	Thiotrichales	Piscirickettsiaceae	sf_3	9027	7688	AF064545.1	Thiomicrospira crunogena	0.301599	0.0226106	0.000860652
Bacteroidetes	Flavobacteria	Flavobacteriales	Flavobacteriaceae	sf_1	5521	72771	AF493689.1	Flavobacteriaceae str.†	-0.300552	0.0231079	0.00089215
Proteobacteria	Deltaproteobacteria	Desulfobacterales	Desulfobacteraceae	sf_5	9777	86388	AY197376.1	Hydrothermal vent sediments clone†	-0.29988	0.0234316	0.000917387
Bacteroidetes	Bacteroidetes	Bacteroidales	Porphyromonadaceae	sf_1	5713	1931	X82823.1	Porphyromonas catoniae†	-0.29866	0.0240295	0.000953863
Proteobacteria	Deltaproteobacteria	Myxococcales	Polyangiaceae	sf_3	9735	77008	AJ518790.1	Soil clone	0.298414	0.0241517	0.000971845
Unclassified	Unclassified	Unclassified	Unclassified	sf_93	925	41280	AF254404.1	4MB-degrading clone	-0.298152	0.0242826	0.000990318
Bacteroidetes	Flavobacteria	Flavobacteriales	Flavobacteriaceae	sf_1	5695	77676	AJ535225.1	Marine sediment clone†	-0.296152	0.0252996	0.00105931
Actinobacteria	Actinobacteria	Actinomycetales	Actinomycetaceae	sf_1	2039	60136	AJ421779.1	Actinomyces cardiffensis†	-0.29555	0.0256124	0.00108634
Proteobacteria	Gammaproteobacteria	Enterobacteriales	Enterobacteriaceae	sf_1	8236	63934	AF476110.1	Vryburgia amaryllidis symbiont	-0.293658	0.0266171	0.0011579
Unclassified	Unclassified	Unclassified	Unclassified	sf_95	2545	85421	AB106352.1	Anaerobic sludge isolate	-0.293329	0.0267953	0.00118022
Proteobacteria	Gammaproteobacteria	SAR86	Unclassified	sf_1	8962	60646	AF406526.1	Bacterioplankton clone	-0.293198	0.0268666	0.00119797
Bacteroidetes	Bacteroidetes	Bacteroidales	Prevotellaceae	sf_1	6011	107238	AB185583.1	Rumen clone†	-0.292987	0.0269816	0.00121777
Proteobacteria	Deltaproteobacteria	AMD clone group	Unclassified	sf_1	9678	63331	AF523883.1	Wetland clone†	-0.290776	0.0282119	0.00128863
Proteobacteria	Deltaproteobacteria	AMD clone group	Unclassified	sf_1	6830	63330	AF523882.1	Wetland clone†	-0.290398	0.0284267	0.0013139
Bacteroidetes	Bacteroidetes	Bacteroidales	Prevotellaceae	sf_1	5718	28563	AF183403.1	Prevotella tannerae†	-0.289495	0.0289458	0.00135364
Firmicutes	Mollicutes	Acholeplasmatales	Acholeplasmataceae	sf_1	4046	15583	L33735.1	Mycoplasma-like organism*	-0.28917	0.0291349	0.00137832
Bacteroidetes	Flavobacteria	Flavobacteriales	Flavobacteriaceae	sf_1	5434	56208	AF543293.1	Capnocytophaga sp.†	-0.288797	0.0293526	0.00140458
Bacteroidetes	Bacteroidetes	Bacteroidales	Unclassified	sf_15	6233	59562	AY134906.1	Oral periodontitis clone†	-0.287063	0.0303836	0.00147044
Proteobacteria	Gammaproteobacteria	Pseudomonadales	Pseudomonadaceae	sf_1	8209	76301	AJ518787.1	Soil clone	0.286285	0.0308558	0.00151007
Bacteroidetes	Bacteroidetes	Bacteroidales	Porphyromonadaceae	sf_1	5460	38278	AJ400267.2	Mouse feces clone†	-0.285576	0.0312911	0.00154839
Chlorobi	Unclassified	Unclassified	Unclassified	sf_6	5294	83562	AY221073.1	Mammoth cave clone†	-0.284636	0.0318768	0.00159471
Proteobacteria	Gammaproteobacteria	Pseudomonadales	Pseudomonadaceae	sf_1	9028	79231	AF468452.1	Pseudomonas koreensis	0.284466	0.0319837	0.00161745
Chloroflexi	Dehalococcoidetes	Unclassified	Unclassified	sf_1	2367	63109	AY093473.1	Marine sediment clone	-0.281616	0.0338204	0.00172872
Proteobacteria	Gammaproteobacteria	Pseudomonadales	Pseudomonadaceae	sf_1	9366	29705	AJ293826.1	Arctic seawater isolate	0.281521	0.0338828	0.00175033
Cyanobacteria	Cyanobacteria	Nostocales	Unclassified	sf_1	5057	110881	AJ781148.1	Nodularia sphaerocarpa	0.281315	0.0340193	0.00177588
Proteobacteria	Deltaproteobacteria	AMD clone group	Unclassified	sf_1	3084	55916	AF523884.1	Wetland clone†	-0.27918	0.0354586	0.00190886
Bacteroidetes	Bacteroidetes	Bacteroidales	Porphyromonadaceae	sf_1	6012	25137	AJ400264.1	Mouse feces clone†	-0.27806	0.0362335	0.00197028
Proteobacteria	Betaproteobacteria	Burkholderiales	Comamonadaceae	sf_1	7718	105081	AY291119.1	Lampropedia hyalina	0.27794	0.0363178	0.00199462
Firmicutes	Mollicutes	Mycoplasmatales	Mycoplasmataceae	sf_1	3929	79153	AY191226.1	Mycoplasma gypsbengalensis*	-0.276115	0.0376133	0.00208622
Proteobacteria	Gammaproteobacteria	Pasteurellales	Pasteurellaceae	sf_1	9030	85860	AY216870.1	Volucribacter amazonae	-0.275777	0.0378573	0.00214092
Proteobacteria	Gammaproteobacteria	Pseudomonadales	Pseudomonadaceae	sf_1	9493	66813	AF430125.1	Pseudomonas sp.	0.274233	0.0389888	0.00222611
Cyanobacteria	Cyanobacteria	Chloroplasts	Chloroplasts	sf_11	5123	31682	AF289249.1	Lepocinclis fusiformis clone	-0.273954	0.0391965	0.00225929
Bacteroidetes	Bacteroidetes	Bacteroidales	Prevotellaceae	sf_1	5437	86520	AY244919.1	Cow rumen clone†	-0.273388	0.0396201	0.00230525
Bacteroidetes	Bacteroidetes	Bacteroidales	Prevotellaceae	sf_1	6207	83758	AY244912.1	Cow rumen clone†	-0.27249	0.0403004	0.00236675
Bacteroidetes	Bacteroidetes	Bacteroidales	Prevotellaceae	sf_1	5720	68339	AF481227.1	Prevotella sp.†	-0.271396	0.0411415	0.00243851
Bacteroidetes	Flavobacteria	Flavobacteriales	Flavobacteriaceae	sf_1	5906	2373	X67609.1	Capnocytophaga sputigena†	-0.271294	0.041221	0.00246564
Bacteroidetes	Flavobacteria	Flavobacteriales	Flavobacteriaceae	sf_1	5726	71901	AY008691.1	Bergeyella sp. clone†	-0.27121	0.0412858	0.00249196
Spirochaetes	Spirochaetes	Spirochaetales	Spirochaetaceae	sf_2	6493	4182	U42284.1	Borrelia anserina	-0.27046	0.0418728	0.00255017
Fusobacteria	Fusobacteria	Fusobacterales	Fusobacteriaceae	sf_1	488	111436	NZ_AABF02000111.1	Fusobacterium nucleatum†	-0.270089	0.0421656	0.00259093
Proteobacteria	Gammaproteobacteria	Pseudomonadales	Pseudomonadaceae	sf_1	8513	8588	AF064458.1	Pseudomonas monteilii	0.268448	0.0434805	0.00269537
Bacteroidetes	Flavobacteria	Flavobacteriales	Flavobacteriaceae	sf_1	5991	37069	AB032506.1	Tenacibaculum ovolyticum†	-0.268139	0.0437324	0.00273476
Proteobacteria	Gammaproteobacteria	Pseudomonadales	Pseudomonadaceae	sf_1	8850	8531	D88521.1	Agrobacterium agile	0.268057	0.0437987	0.00276272
Proteobacteria	Alphaproteobacteria	Rickettsiales	Anaplasmataceae	sf_3	6908	6121	M85267.1	Rhinocyllus conicus endosymbiont*	-0.266551	0.0450428	0.00289019
Bacteroidetes	Bacteroidetes	Bacteroidales	Porphyromonadaceae	sf_1	5680	82191	AB100460.1	Termite gut clone	-0.266532	0.0450585	0.00291569
Bacteroidetes	Flavobacteria	Flavobacteriales	Flavobacteriaceae	sf_1	6269	61189	AY080916.1	Forest soil clone	-0.26573	0.0457331	0.00298422
Bacteroidetes	Bacteroidetes	Bacteroidales	Prevotellaceae	sf_1	5946	72779	AF385511.1	Tongue dorsa clone	-0.26569	0.0457668	0.0030113
Proteobacteria	Betaproteobacteria	Neisseriales	Neisseriaceae	sf_1	7701	6375	L06174.1	Vitreoscilla stercoraria	-0.264346	0.0469166	0.00311246
Proteobacteria	Deltaproteobacteria	AMD clone group	Unclassified	sf_1	10084	56683	AF543496.1	Acid mine drainage clone†	-0.26403	0.0471897	0.0031819
Bacteroidetes	Bacteroidetes	Bacteroidales	Prevotellaceae	sf_1	5916	83344	AY244931.1	Cow rumen clone†	-0.263749	0.0474342	0.00324998
Bacteroidetes	Bacteroidetes	Bacteroidales	Prevotellaceae	sf_1	5484	71907	AY134905.1	Oral periodontitis clone†	-0.263594	0.0475698	0.00328514
Proteobacteria	Gammaproteobacteria	Pseudomonadales	Pseudomonadaceae	sf_1	8813	77437	AY150184.1	Lyrodus pedicellatus symbiont	0.263325	0.047805	0.00332737
Proteobacteria	Gammaproteobacteria	Pseudomonadales	Pseudomonadaceae	sf_1	8601	8733	AB021401.1	Pseudomonas marginalis	0.263093	0.0480088	0.00336767
Proteobacteria	Betaproteobacteria	Unclassified	Unclassified	sf_3	8036	74988	AJ519624.1	Soil clone	0.261821	0.0491393	0.0035004
Negatively correlating taxa are highlighted in grey.
*obligate intracellular parasites
†anaerobes
